# Supplementary material for: Application of Drug Efficiency Index Metric for Analysis of Post-Traumatic Stress Disorder and Treatment Resistant Depression Gene Expression Profiles
Source: MDPI journal article supplement (doi:10.3390/psychoactives2020007), 2023-03-23
Supplement: s1 [file s1]

Archive with 9 entries (9 files):
- Supplementary File S3_GSE64814-GPL11154.xlsx
- Supplementary File S4_GSE97356.xlsx
- Supplementary File S5_GSE81761.xlsx
- Supplementary File S6_GSE185855.xlsx
- Supplementary File S7.pdf
- Supplementary File S8.csv
- Supplementary File S9.xlsx
- Supplementary File S1_GSE860.xlsx
- Supplementary File S2_GSE64814-GPL6244.xlsx
