# Supplementary material for: Application of Drug Efficiency Index Metric for Analysis of Post-Traumatic Stress Disorder and Treatment Resistant Depression Gene Expression Profiles
Source: MDPI journal article supplement (doi:10.3390/psychoactives2020007), 2023-03-23
Supplement: s1 [file s1 › Supplementary File S1_GSE860.xlsx]

## Sheet: exp_N_vs_D
SYMBOL	marker	AUC	UpDown	Log2FC	Description	Biological.Process.(GO)
PAX3	PAX3	0.860294117647059	Up	0.231912672487478	paired box 3	GO:0007605 sensory perception of sound;GO:0050954 sensory perception of mechanical stimulus;GO:0007517 muscle organ development
PEX2	PEX2	0.860294117647059	Down	-0.372521503752342	peroxisomal biogenesis factor 2	GO:0016558 protein import into peroxisome matrix;GO:0006625 protein targeting to peroxisome;GO:0072662 protein localization to peroxisome
TGFB1	TGFB1	0.852941176470588	Up	0.230123914581698	transforming growth factor beta 1	GO:0014006 regulation of microglia differentiation;GO:0014008 positive regulation of microglia differentiation;GO:1905313 transforming growth factor beta receptor signaling pathway involved in heart development
ELANE	ELANE	0.867647058823529	Up	0.96634058275167	elastase, neutrophil expressed	GO:0002812 biosynthetic process of antibacterial peptides active against Gram-negative bacteria;GO:0070947 neutrophil-mediated killing of fungus;GO:0002775 antimicrobial peptide production
ATP6V0A2	ATP6V0A2	0.856617647058824	Up	0.307773740507757	ATPase H+ transporting V0 subunit a2	GO:0061795 Golgi lumen acidification;GO:0036295 cellular response to increased oxygen levels;GO:0036296 response to increased oxygen levels
AKAP5	AKAP5	0.878676470588235	Up	0.612469160265571	A-kinase anchoring protein 5	GO:1905751 positive regulation of endosome to plasma membrane protein transport;GO:1905749 regulation of endosome to plasma membrane protein transport;GO:2001137 positive regulation of endocytic recycling
RBM39	RBM39	0.867647058823529	Down	-0.566883450129477	RNA binding motif protein 39	GO:0048024 regulation of mRNA splicing, via spliceosome;GO:0050684 regulation of mRNA processing;GO:0043484 regulation of RNA splicing
HDGF	HDGF	0.867647058823529	Up	0.212089725668763	heparin binding growth factor	GO:0098760 response to interleukin-7;GO:0098761 cellular response to interleukin-7;GO:0043524 negative regulation of neuron apoptotic process
CCDC86	CCDC86	0.856617647058824	Up	0.214664449138668	coiled-coil domain containing 86
PLN	PLN	0.841911764705882	Up	0.457404549091204	phospholamban	GO:0086092 regulation of the force of heart contraction by cardiac conduction;GO:1902081 negative regulation of calcium ion import into sarcoplasmic reticulum;GO:1902080 regulation of calcium ion import into sarcoplasmic reticulum
CD86	CD86	0.856617647058823	Down	-0.426263073065805	CD86 molecule	GO:0032681 regulation of lymphotoxin A production;GO:0032761 positive regulation of lymphotoxin A production;GO:1990051 activation of protein kinase C activity
CACNA1C	CACNA1C	0.852941176470588	Up	0.173111952829069	calcium voltage-gated channel subunit alpha1 C	GO:0061577 calcium ion transmembrane transport via high voltage-gated calcium channel;GO:0098912 membrane depolarization during atrial cardiac muscle cell action potential;GO:0035585 calcium-mediated signaling using extracellular calcium source

## Sheet: exp_A_vs_P
SYMBOL	marker	AUC	UpDown	Log2FC	Description	Biological.Process.(GO)
DNAJB2	DNAJB2	1	Down	-0.297422708568496	DnaJ heat shock protein family (Hsp40) member B2	GO:1903644 regulation of chaperone-mediated protein folding;GO:1903332 regulation of protein folding;GO:0090084 negative regulation of inclusion body assembly
OR7E24	OR7E24	0.986111111111111	Up	0.413712947619298	olfactory receptor family 7 subfamily E member 24	GO:0050911 detection of chemical stimulus involved in sensory perception of smell;GO:0007608 sensory perception of smell;GO:0050907 detection of chemical stimulus involved in sensory perception
IGLC1	IGLC1	0.972222222222222	Down	-0.537602207444179	immunoglobulin lambda constant 1	GO:0006910 phagocytosis, recognition;GO:0006958 complement activation, classical pathway;GO:0002455 humoral immune response mediated by circulating immunoglobulin
IGLJ3	IGLJ3	0.958333333333333	Down	-0.379292629567033	immunoglobulin lambda joining 3
IGK	IGK	0.944444444444444	Down	-0.72319453774654	immunoglobulin kappa locus
SFRP4	SFRP4	0.944444444444444	Up	0.642108200396363	secreted frizzled related protein 4	GO:2000119 negative regulation of sodium-dependent phosphate transport;GO:1902174 positive regulation of keratinocyte apoptotic process;GO:2000118 regulation of sodium-dependent phosphate transport
MPP6	MPP6	0.930555555555556	Down	-0.421033157698877	M-phase phosphoprotein 6	GO:0000460 maturation of 5.8S rRNA;GO:0006364 rRNA processing;GO:0016072 rRNA metabolic process

## Sheet: spia_N_vs_D
marker	AUC	UpDown	Diff
ERK_Signaling_Pathway	0.779411764705882	Up	0.835678639705882
cAMP_Pathway_Glycolysis	0.738970588235294	Down	-0.143464294117647
cAMP_Pathway_Regulation_of_Cytoskeleton	0.707720588235294	Down	-0.356203297794118
cAMP_Pathway_Protein_Retention	0.707720588235294	Down	-0.356203297794118
cAMP_Pathway_Oncogenesis	0.707720588235294	Down	-0.356203297794118
cAMP_Pathway_Myocardial_Contraction	0.707720588235294	Down	-0.356203297794118
cAMP_Pathway_Glycogen_Synthesis	0.707720588235294	Down	-0.356203297794118
cAMP_Pathway_Degradation_of_Cell_Cycle_Regulators	0.707720588235294	Down	-0.356203297794118
cAMP_Pathway_Cell_Survival	0.707720588235294	Down	-0.356203297794118
cAMP_Pathway_Cell_Proliferation	0.707720588235294	Down	-0.356203297794118
cAMP_Pathway_Cardiovascular_Homeostasis	0.707720588235294	Down	-0.356203297794118
cAMP_Pathway_Axonal_Growth	0.707720588235294	Down	-0.356203297794118
PAK_Pathway_Myosin_Activation	0.716911764705882	Up	3.30438211764706
PAK_Pathway_Actin_Cytoskeleton	0.716911764705882	Up	1.44566723897059
PAK_Pathway	0.716911764705882	Up	3.29749812132353
cAMP_Pathway	0.707720588235294	Down	-1.15730623529412

## Sheet: spia_A_vs_P
marker	AUC	UpDown	Diff
Hedgehog_Pathway	1	Up	2.60007420833333
TRAF_p_Pathway	0.944444444444444	Up	20.0086662222222
TRAF_m_Pathway	0.944444444444444	Up	21.9465516666667
TNF_p_Pathway_Gene_expression_Cell_Survival	0.944444444444444	Up	3.63353511111111
TNF_p_Pathway	0.944444444444444	Up	5.45030244444444
TGF_beta_Pathway_SnON_degradation	0.944444444444444	Up	2.90682811111111
TGF_beta_Pathway	0.944444444444444	Up	7.21516244444444
RANK_Signaling_in_Osteoclast_Pathway	0.944444444444444	Up	3.87577066666667
p38_p_Signaling_Pathway	0.944444444444444	Up	1.09735522222222
mTOR_Pathway_VEGF_pathway	0.944444444444444	Up	0.793974111111111
MAPK_Signaling_Pathway_Gene_Expression	0.944444444444444	Up	2.180121
MAPK_Signaling_Pathway	0.944444444444444	Up	6.57584288888889
MAPK_Family_Pathway_Gene_Expression	0.944444444444444	Up	1.45341388888889
MAPK_Family_Pathway	0.944444444444444	Up	4.64285033333333
JNK_Pathway_Apoptosis_Inflammation_Tumorogenesis_Cell_Migration	0.944444444444444	Up	0.181676888888889
JNK_Pathway	0.944444444444444	Up	1.03469233333333
JAK_mStat_Pathway	0.944444444444444	Up	3.79694288888889
Integrin_Signaling_Pathway_Cytoskeleton_contraction_integrin_modulation_cell_invasion_and_migration	0.944444444444444	Up	5.086949
Integrin_Signaling_Pathway	0.944444444444444	Up	5.45030244444444
IL_2_Pathway	0.944444444444444	Up	5.15301333333333
HIF1Alpha_Pathway_VEGF_pathway	0.944444444444444	Up	4.76384433333333
