# Supplementary material for: Application of Drug Efficiency Index Metric for Analysis of Post-Traumatic Stress Disorder and Treatment Resistant Depression Gene Expression Profiles
Source: MDPI journal article supplement (doi:10.3390/psychoactives2020007), 2023-03-23
Supplement: s1 [file s1 › Supplementary File S2_GSE64814-GPL6244.xlsx]

## Sheet: exp_N_vs_D
SYMBOL	marker	AUC	UpDown	Log2FC	Description	Biological.Process.(GO)
EPSTI1	EPSTI1	0.729166666666667	Up	0.839890612183744	epithelial stromal interaction 1
RPS4Y2	RPS4Y2	0.708767361111111	Down	-0.177804094692389	ribosomal protein S4 Y-linked 2	GO:0006412 translation;GO:0043043 peptide biosynthetic process;GO:0043604 amide biosynthetic process
HSD17B13	HSD17B13	0.706163194444444	Down	-0.270655805530168	hydroxysteroid 17-beta dehydrogenase 13	GO:0046889 positive regulation of lipid biosynthetic process;GO:0045834 positive regulation of lipid metabolic process;GO:0046890 regulation of lipid biosynthetic process

## Sheet: exp_A_vs_P
SYMBOL	marker	AUC	UpDown	Log2FC	Description	Biological.Process.(GO)
SCARNA7	SCARNA7	0.986111111111111	Down	-1.23392192078689	small Cajal body-specific RNA 7	GO:0006396 RNA processing;GO:0016070 RNA metabolic process;GO:0090304 nucleic acid metabolic process
SNORD6	SNORD6	0.975694444444444	Down	-2.77602288320424	small nucleolar RNA, C/D box 6	GO:0006396 RNA processing;GO:0016070 RNA metabolic process;GO:0090304 nucleic acid metabolic process
SNORD43	SNORD43	0.932291666666667	Down	-1.55221758225938	small nucleolar RNA, C/D box 43	GO:0006396 RNA processing;GO:0016070 RNA metabolic process;GO:0090304 nucleic acid metabolic process
NELFE	NELFE	0.927083333333333	Down	-0.963082054311144	negative elongation factor complex member E	GO:0034244 negative regulation of transcription elongation by RNA polymerase II;GO:0032785 negative regulation of DNA-templated transcription, elongation;GO:0051571 positive regulation of histone H3-K4 methylation
CYTH1	CYTH1	0.921875	Down	-0.531809679407306	cytohesin 1	GO:0032012 regulation of ARF protein signal transduction;GO:0090162 establishment of epithelial cell polarity;GO:0030010 establishment of cell polarity
SCARNA17	SCARNA17	0.907986111111111	Down	-0.812247466698052	small Cajal body-specific RNA 17	GO:0006396 RNA processing;GO:0016070 RNA metabolic process;GO:0090304 nucleic acid metabolic process
C6orf47	C6orf47	0.901041666666667	Down	-0.560338562593833	chromosome 6 open reading frame 47
ACAA1	ACAA1	0.887152777777778	Down	-0.648942857047352	acetyl-CoA acyltransferase 1	GO:0010124 phenylacetate catabolic process;GO:0036109 alpha-linolenic acid metabolic process;GO:0033540 fatty acid beta-oxidation using acyl-CoA oxidase
PHTF1	PHTF1	0.876736111111111	Down	-0.388594833309574	putative homeodomain transcription factor 1
PFKM	PFKM	0.871527777777778	Down	-0.314037266795838	phosphofructokinase, muscle	GO:0093001 glycolysis from storage polysaccharide through glucose-1-phosphate;GO:0061622 glycolytic process through glucose-1-phosphate;GO:0030388 fructose 1,6-bisphosphate metabolic process
ENTR1	ENTR1	0.864583333333333	Down	-0.531948749149707	endosome associated trafficking regulator 1	GO:1903566 positive regulation of protein localization to cilium;GO:1903564 regulation of protein localization to cilium;GO:0045724 positive regulation of cilium assembly
PICK1	PICK1	0.866319444444444	Down	-0.494561911042734	protein interacting with PRKCA 1	GO:0034316 negative regulation of Arp2/3 complex-mediated actin nucleation;GO:0051126 negative regulation of actin nucleation;GO:0043045 DNA methylation involved in embryo development
PLCB2	PLCB2	0.864583333333333	Down	-0.382055865807763	phospholipase C beta 2	GO:0007202 activation of phospholipase C activity;GO:0001580 detection of chemical stimulus involved in sensory perception of bitter taste;GO:0010863 positive regulation of phospholipase C activity
DRAP1	DRAP1	0.980902777777778	Up	1.05611228607609	DR1 associated protein 1	GO:0006366 transcription by RNA polymerase II;GO:0006351 DNA-templated transcription;GO:0097659 nucleic acid-templated transcription
ROMO1	ROMO1	0.951388888888889	Up	1.48882241308486	reactive oxygen species modulator 1	GO:0051838 cytolysis by host of symbiont cells;GO:0045039 protein insertion into mitochondrial inner membrane;GO:0090399 replicative senescence
RPPH1	RPPH1	0.9375	Up	0.923092837126365	ribonuclease P RNA component H1	GO:0090502 RNA phosphodiester bond hydrolysis, endonucleolytic;GO:0008033 tRNA processing;GO:0090501 RNA phosphodiester bond hydrolysis
SNORA65	SNORA65	0.892361111111111	Up	1.00823526316818	small nucleolar RNA, H/ACA box 65	GO:0006396 RNA processing;GO:0016070 RNA metabolic process;GO:0090304 nucleic acid metabolic process
IFNE	IFNE	0.901041666666667	Up	0.464578424770594	interferon epsilon	GO:0033141 positive regulation of peptidyl-serine phosphorylation of STAT protein;GO:0033139 regulation of peptidyl-serine phosphorylation of STAT protein;GO:0002323 natural killer cell activation involved in immune response
SNORD24	SNORD24	0.873263888888889	Up	1.24719265586691	small nucleolar RNA, C/D box 24	GO:0006396 RNA processing;GO:0016070 RNA metabolic process;GO:0090304 nucleic acid metabolic process
SNORD68	SNORD68	0.873263888888889	Up	0.862827424755416	small nucleolar RNA, C/D box 68	GO:0006396 RNA processing;GO:0016070 RNA metabolic process;GO:0090304 nucleic acid metabolic process
CADM2	CADM2	0.869791666666667	Up	0.908695735664974	cell adhesion molecule 2	GO:0007156 homophilic cell adhesion via plasma membrane adhesion molecules;GO:0098742 cell-cell adhesion via plasma-membrane adhesion molecules;GO:0098609 cell-cell adhesion

## Sheet: spia_N_vs_D
marker	AUC	UpDown	Diff

## Sheet: spia_A_vs_P
marker	AUC	UpDown	Diff
Cellular_Anti_Apoptosis_Pathway_Apoptosis	0.833333333333333	Up	1.39054016666667
Cellular_Anti_Apoptosis_Pathway	0.833333333333333	Up	0.849774583333333
ILK_Pathway	0.708333333333333	Down	-1.38117241666667
