# Supplementary material for: Application of Drug Efficiency Index Metric for Analysis of Post-Traumatic Stress Disorder and Treatment Resistant Depression Gene Expression Profiles
Source: MDPI journal article supplement (doi:10.3390/psychoactives2020007), 2023-03-23
Supplement: s1 [file s1 › Supplementary File S3_GSE64814-GPL11154.xlsx]

## Sheet: exp_N_vs_D
marker	AUC	UpDown	Log2FC	Description	Biological.Process.(GO)

## Sheet: exp_A_vs_P
SYMBOL	marker	AUC	UpDown	Log2FC	Description	Biological.Process.(GO)
SAP18	SAP18	0.875509280217293	Down	-0.136882074021027	Sin3A associated protein 18	GO:0048025 negative regulation of mRNA splicing, via spliceosome;GO:0050686 negative regulation of mRNA processing;GO:0033119 negative regulation of RNA splicing
OCIAD1	OCIAD1	0.868266183793572	Down	-0.120704154990046	OCIA domain containing 1	GO:0061484 hematopoietic stem cell homeostasis;GO:0046427 positive regulation of receptor signaling pathway via JAK-STAT;GO:1904894 positive regulation of receptor signaling pathway via STAT
MED4	MED4	0.860117700316886	Down	-0.124609384590108	mediator complex subunit 4	GO:0032968 positive regulation of transcription elongation by RNA polymerase II;GO:0051123 RNA polymerase II preinitiation complex assembly;GO:0060261 positive regulation of transcription initiation by RNA polymerase II
ERH	ERH	0.844726120416478	Down	-0.159041340629265	ERH mRNA splicing and mitosis factor	GO:0006213 pyrimidine nucleoside metabolic process;GO:0009116 nucleoside metabolic process;GO:1901657 glycosyl compound metabolic process
PCNP	PCNP	0.8415572657311	Down	-0.133775766291692	PEST proteolytic signal containing nuclear protein	GO:0043161 proteasome-mediated ubiquitin-dependent protein catabolic process;GO:0010498 proteasomal protein catabolic process;GO:0006511 ubiquitin-dependent protein catabolic process
RBX1	RBX1	0.830239927569036	Down	-0.179877178923945	ring-box 1	GO:1902499 positive regulation of protein autoubiquitination;GO:1902498 regulation of protein autoubiquitination;GO:0045116 protein neddylation
SPCS2	SPCS2	0.825260298777727	Down	-0.134658828690203	signal peptidase complex subunit 2	GO:0006465 signal peptide processing;GO:0045047 protein targeting to ER;GO:0072599 establishment of protein localization to endoplasmic reticulum
SRSF3	SRSF3	0.818017202354006	Down	-0.123224456184068	serine and arginine rich splicing factor 3	GO:0031053 primary miRNA processing;GO:0035196 miRNA processing;GO:0070918 small regulatory ncRNA processing
RPL13AP20	RPL13AP20	0.815301041195111	Down	-0.327649427756363	ribosomal protein L13a pseudogene 20
POLR2K	POLR2K	0.812584880036215	Down	-0.179941067159422	RNA polymerase II, I and III subunit K	GO:0006383 transcription by RNA polymerase III;GO:0006356 regulation of transcription by RNA polymerase I;GO:0006366 transcription by RNA polymerase II
IRGQ	IRGQ	0.847442281575373	Up	0.178670901779789	immunity related GTPase Q
MAVS	MAVS	0.842462652784065	Up	0.167067934206667	mitochondrial antiviral signaling protein	GO:0071660 positive regulation of IP-10 production;GO:1900063 regulation of peroxisome organization;GO:0071658 regulation of IP-10 production
ZBTB37	ZBTB37	0.839293798098687	Up	0.330209455969401	zinc finger and BTB domain containing 37	GO:0000122 negative regulation of transcription by RNA polymerase II;GO:0045892 negative regulation of DNA-templated transcription;GO:1903507 negative regulation of nucleic acid-templated transcription
MLXIP	MLXIP	0.829334540516071	Up	0.238387462723721	MLX interacting protein	GO:0045944 positive regulation of transcription by RNA polymerase II;GO:0045893 positive regulation of DNA-templated transcription;GO:1903508 positive regulation of nucleic acid-templated transcription
TAOK2	TAOK2	0.82752376641014	Up	0.177768467506847	TAO kinase 2	GO:0150018 basal dendrite development;GO:0150019 basal dendrite morphogenesis;GO:0150020 basal dendrite arborization
INPPL1	INPPL1	0.819827976459937	Up	0.228539899034097	inositol polyphosphate phosphatase like 1	GO:0043569 negative regulation of insulin-like growth factor receptor signaling pathway;GO:0097178 ruffle assembly;GO:0043567 regulation of insulin-like growth factor receptor signaling pathway
SRCAP	SRCAP	0.826618379357175	Up	0.167641275591506	Snf2 related CREBBP activator protein	GO:0043486 histone exchange;GO:0016573 histone acetylation;GO:0018393 internal peptidyl-lysine acetylation
SRRM2	SRRM2	0.817111815301041	Up	0.178438735771747	serine/arginine repetitive matrix 2	GO:0000377 RNA splicing, via transesterification reactions with bulged adenosine as nucleophile;GO:0000398 mRNA splicing, via spliceosome;GO:0000375 RNA splicing, via transesterification reactions
MLL2	MLL2	0.815301041195111	Up	0.298478603488517	lysine methyltransferase 2D	GO:1904837 beta-catenin-TCF complex assembly;GO:0001555 oocyte growth;GO:0044648 histone H3-K4 dimethylation
NCOR2	NCOR2	0.814395654142146	Up	0.236960223693052	nuclear receptor corepressor 2	GO:0044849 estrous cycle;GO:0060766 negative regulation of androgen receptor signaling pathway;GO:1903799 negative regulation of miRNA maturation
PIP5K1C	PIP5K1C	0.813490267089181	Up	0.203495676865848	phosphatidylinositol-4-phosphate 5-kinase type 1 gamma	GO:0034333 adherens junction assembly;GO:0072583 clathrin-dependent endocytosis;GO:0034332 adherens junction organization

## Sheet: spia_N_vs_D
marker	AUC	UpDown	Diff

## Sheet: spia_A_vs_P
marker	AUC	UpDown	Diff
