# Supplementary material for: Application of Drug Efficiency Index Metric for Analysis of Post-Traumatic Stress Disorder and Treatment Resistant Depression Gene Expression Profiles
Source: MDPI journal article supplement (doi:10.3390/psychoactives2020007), 2023-03-23
Supplement: s1 [file s1 › Supplementary File S4_GSE97356.xlsx]

## Sheet: exp_N_vs_D
marker	AUC	UpDown	Log2FC	Description	Biological.Process.(GO)

## Sheet: exp_A_vs_P
SYMBOL	marker	AUC	UpDown	Log2FC	Description	Biological.Process.(GO)
SLC9A7P1	SLC9A7P1	0.740446796002352	Down	-0.485472286394742	solute carrier family 9 member 7 pseudogene 1
PTGFR	PTGFR	0.725749559082892	Down	-0.861407927465266	prostaglandin F receptor	GO:0071798 response to prostaglandin D;GO:0071799 cellular response to prostaglandin D stimulus;GO:0007567 parturition
ANXA13	ANXA13	0.712522045855379	Down	-0.41549185639471	annexin A13	GO:0030154 cell differentiation;GO:0048869 cellular developmental process;GO:0032502 developmental process
VCAN	VCAN	0.708112874779541	Down	-0.362550118590811	versican	GO:0001649 osteoblast differentiation;GO:0008037 cell recognition;GO:0001503 ossification
MARCH1	MARCH1	0.70870076425632	Down	-0.209190102082529	membrane associated ring-CH-type finger 1	GO:0002495 antigen processing and presentation of peptide antigen via MHC class II;GO:0002504 antigen processing and presentation of peptide or polysaccharide antigen via MHC class II;GO:0048002 antigen processing and presentation of peptide antigen
GPR135	GPR135	0.711346266901822	Down	-0.609328885873755	G protein-coupled receptor 135	GO:0007186 G protein-coupled receptor signaling pathway;GO:0007165 signal transduction;GO:0023052 signaling
LMO3	LMO3	0.716196355085244	Down	-0.703820803544341	LIM domain only 3	GO:2000324 positive regulation of glucocorticoid receptor signaling pathway;GO:2000322 regulation of glucocorticoid receptor signaling pathway;GO:0035360 positive regulation of peroxisome proliferator activated receptor signaling pathway
HECTD1	HECTD1	0.71222810111699	Down	-0.0964159910113001	HECT domain E3 ubiquitin protein ligase 1	GO:0060707 trophoblast giant cell differentiation;GO:0001779 natural killer cell differentiation;GO:0060706 cell differentiation involved in embryonic placenta development
GRIK1	GRIK1.AS1	0.705026455026455	Down	-0.539732440645243	glutamate ionotropic receptor kainate type subunit 1	GO:0035235 ionotropic glutamate receptor signaling pathway;GO:1990806 ligand-gated ion channel signaling pathway;GO:0035249 synaptic transmission, glutamatergic
CASP10	CASP10	0.70487948265726	Down	-0.139640864314746	caspase 10	GO:0097194 execution phase of apoptosis;GO:0006919 activation of cysteine-type endopeptidase activity involved in apoptotic process;GO:0043280 positive regulation of cysteine-type endopeptidase activity involved in apoptotic process
RXFP2	RXFP2	0.703115814226925	Down	-0.459181760047088	relaxin family peptide receptor 2	GO:0007190 activation of adenylate cyclase activity;GO:0045762 positive regulation of adenylate cyclase activity;GO:0031281 positive regulation of cyclase activity
BZRAP1	BZRAP1.AS1	0.733392122281011	Up	0.120327750179868	TSPO associated protein 1	GO:0099509 regulation of presynaptic cytosolic calcium ion concentration;GO:0070050 neuron cellular homeostasis;GO:0051480 regulation of cytosolic calcium ion concentration
HMGA1	HMGA1	0.715167548500882	Up	0.232806958868225	high mobility group AT-hook 1	GO:0090402 oncogene-induced cell senescence;GO:0006337 nucleosome disassembly;GO:0032986 protein-DNA complex disassembly
SUPT4H1	SUPT4H1	0.707231040564374	Up	0.139218428497147	SPT4 homolog, DSIF elongation factor subunit	GO:0034244 negative regulation of transcription elongation by RNA polymerase II;GO:0032785 negative regulation of DNA-templated transcription, elongation;GO:0006368 transcription elongation by RNA polymerase II promoter
LOXL1	LOXL1.AS1	0.701058201058201	Up	0.30688810916146	lysyl oxidase like 1	GO:0018277 protein deamination;GO:0018057 peptidyl-lysine oxidation;GO:0018158 protein oxidation

## Sheet: spia_N_vs_D
marker	AUC	UpDown	Diff

## Sheet: spia_A_vs_P
marker	AUC	UpDown	Diff
