# Supplementary material for: Application of Drug Efficiency Index Metric for Analysis of Post-Traumatic Stress Disorder and Treatment Resistant Depression Gene Expression Profiles
Source: MDPI journal article supplement (doi:10.3390/psychoactives2020007), 2023-03-23
Supplement: s1 [file s1 › Supplementary File S5_GSE81761.xlsx]

## Sheet: exp_N_vs_D
SYMBOL	marker	AUC	UpDown	Log2FC	Description	Biological.Process.(GO)
RP11	RP11.796E2.4	0.749090909090909	Down	-0.223363210274669	pre-mRNA processing factor 31	GO:0071166 ribonucleoprotein complex localization;GO:0000244 spliceosomal tri-snRNP complex assembly;GO:0000387 spliceosomal snRNP assembly
NUF2	NUF2	0.753636363636364	Up	0.166424413342296	NUF2 component of NDC80 kinetochore complex	GO:0051315 attachment of mitotic spindle microtubules to kinetochore;GO:0051383 kinetochore organization;GO:0008608 attachment of spindle microtubules to kinetochore
CAB39L	CAB39L	0.77030303030303	Up	0.165810507452694	calcium binding protein 39 like	GO:0071902 positive regulation of protein serine/threonine kinase activity;GO:0071900 regulation of protein serine/threonine kinase activity;GO:0045860 positive regulation of protein kinase activity
RP13	RP13.238F13.5	0.769393939393939	Down	-0.164153740316393	pre-mRNA processing factor 8	GO:0000244 spliceosomal tri-snRNP complex assembly;GO:0000387 spliceosomal snRNP assembly;GO:0071356 cellular response to tumor necrosis factor
CXCL6	CXCL6	0.747878787878788	Up	0.370415095354221	C-X-C motif chemokine ligand 6	GO:0070950 regulation of neutrophil mediated killing of bacterium;GO:0070951 regulation of neutrophil mediated killing of gram-negative bacterium;GO:0070949 regulation of neutrophil mediated killing of symbiont cell
RNASE3	RNASE3	0.761818181818182	Up	0.587559151563932	ribonuclease A family member 3	GO:0043152 induction of bacterial agglutination;GO:0002227 innate immune response in mucosa;GO:0002385 mucosal immune response
EBF4	EBF4	0.745454545454545	Down	-0.282881086715862	EBF family member 4	GO:0006357 regulation of transcription by RNA polymerase II;GO:0006355 regulation of DNA-templated transcription;GO:1903506 regulation of nucleic acid-templated transcription
RGL1	RGL1	0.758787878787879	Up	0.219594079788566	ral guanine nucleotide dissociation stimulator like 1	GO:0007265 Ras protein signal transduction;GO:0007264 small GTPase mediated signal transduction;GO:0043547 positive regulation of GTPase activity
MS4A3	MS4A3	0.753333333333333	Up	0.666734023509512	membrane spanning 4-domains A3	GO:0051726 regulation of cell cycle;GO:0007166 cell surface receptor signaling pathway;GO:0007165 signal transduction
FCRLB	FCRLB	0.754545454545455	Up	0.277700078311894	Fc receptor like B	GO:0050777 negative regulation of immune response;GO:0002683 negative regulation of immune system process;GO:0050776 regulation of immune response
LINC00189	LINC00189	0.748484848484849	Up	0.602750779823663	long intergenic non-protein coding RNA 189
KRT8P17	KRT8P17	0.745454545454545	Down	-0.216242470650418	keratin 8 pseudogene 17

## Sheet: exp_A_vs_P
SYMBOL	marker	AUC	UpDown	Log2FC	Description	Biological.Process.(GO)
SLC9A9	SLC9A9	0.89044289044289	Up	0.234723950988356	solute carrier family 9 member A9	GO:0098719 sodium ion import across plasma membrane;GO:0051453 regulation of intracellular pH;GO:0030641 regulation of cellular pH
NME9	NME9	0.883449883449883	Up	0.351689236953531	NME/NM23 family member 9	GO:0006228 UTP biosynthetic process;GO:0006183 GTP biosynthetic process;GO:0046051 UTP metabolic process
ZNF165	ZNF165	0.869463869463869	Down	-0.291258155494868	zinc finger protein 165	GO:0006357 regulation of transcription by RNA polymerase II;GO:0006355 regulation of DNA-templated transcription;GO:1903506 regulation of nucleic acid-templated transcription
LOC100996583	LOC100996583	0.853146853146853	Down	-0.324453701321493	uncharacterized LOC100996583
ERC1	ERC1	0.839160839160839	Up	0.186215267917245	ELKS/RAB6-interacting/CAST family member 1	GO:0048790 maintenance of presynaptic active zone structure;GO:1990709 presynaptic active zone organization;GO:0007252 I-kappaB phosphorylation
CAMKMT	CAMKMT	0.827505827505827	Down	-0.165215200379496	calmodulin-lysine N-methyltransferase	GO:0022400 regulation of rhodopsin mediated signaling pathway;GO:0018022 peptidyl-lysine methylation;GO:0008277 regulation of G protein-coupled receptor signaling pathway
PPP1R35	PPP1R35	0.82051282051282	Down	-0.321349095018129	protein phosphatase 1 regulatory subunit 35	GO:1903724 positive regulation of centriole elongation;GO:1903722 regulation of centriole elongation;GO:0048570 notochord morphogenesis

## Sheet: exp_R_vs_N
SYMBOL	marker	AUC	UpDown	Log2FC	Description	Biological.Process.(GO)
ZWINT	ZWINT	1	Down	-0.580396125026877	ZW10 interacting kinetochore protein	GO:0007094 mitotic spindle assembly checkpoint signaling;GO:0071173 spindle assembly checkpoint signaling;GO:0071174 mitotic spindle checkpoint signaling
ZWILCH	ZWILCH	1	Down	-0.525606664404028	zwilch kinetochore protein	GO:0034501 protein localization to kinetochore;GO:1903083 protein localization to condensed chromosome;GO:0007094 mitotic spindle assembly checkpoint signaling
ZSWIM8	ZSWIM8	1	Up	0.270892389211139	zinc finger SWIM-type containing 8	GO:2000627 positive regulation of miRNA catabolic process;GO:2000625 regulation of miRNA catabolic process;GO:2000630 positive regulation of miRNA metabolic process
ZNRF2	ZNRF2	1	Down	-0.208489889084154	zinc and ring finger 2	GO:0070936 protein K48-linked ubiquitination;GO:0000209 protein polyubiquitination;GO:0043161 proteasome-mediated ubiquitin-dependent protein catabolic process
ZNHIT6	ZNHIT6	1	Down	-0.439509288005112	zinc finger HIT-type containing 6	GO:0048254 snoRNA localization;GO:0000492 box C/D snoRNP assembly;GO:0000491 small nucleolar ribonucleoprotein complex assembly
ZNF84	ZNF84	1	Down	-0.501052193113362	zinc finger protein 84	GO:0006357 regulation of transcription by RNA polymerase II;GO:0006355 regulation of DNA-templated transcription;GO:1903506 regulation of nucleic acid-templated transcription
ZNF830	ZNF830	1	Down	-0.553191578787517	zinc finger protein 830	GO:0001546 preantral ovarian follicle growth;GO:0048162 multi-layer follicle stage;GO:0060729 intestinal epithelial structure maintenance
ZNF780B	ZNF780B	1	Down	-0.193091416048939	zinc finger protein 780B	GO:0045944 positive regulation of transcription by RNA polymerase II;GO:0045893 positive regulation of DNA-templated transcription;GO:1903508 positive regulation of nucleic acid-templated transcription
ZNF770	ZNF770	1	Down	-0.488069670243712	zinc finger protein 770	GO:0045944 positive regulation of transcription by RNA polymerase II;GO:0045893 positive regulation of DNA-templated transcription;GO:1903508 positive regulation of nucleic acid-templated transcription
ZNF75A	ZNF75A	1	Down	-0.406542019884299	zinc finger protein 75a	GO:0000122 negative regulation of transcription by RNA polymerase II;GO:0045892 negative regulation of DNA-templated transcription;GO:1903507 negative regulation of nucleic acid-templated transcription
ZNF670	ZNF670	1	Down	-0.189414986085453	zinc finger protein 670	GO:0044255 cellular lipid metabolic process;GO:0006629 lipid metabolic process;GO:0006357 regulation of transcription by RNA polymerase II
ZNF639	ZNF639	1	Down	-0.688002692573087	zinc finger protein 639	GO:0043922 negative regulation by host of viral transcription;GO:0043923 positive regulation by host of viral transcription;GO:0051851 modulation by host of symbiont process
ZNF548	ZNF548	1	Down	-0.589686467774106	zinc finger protein 548	GO:0006357 regulation of transcription by RNA polymerase II;GO:0006355 regulation of DNA-templated transcription;GO:1903506 regulation of nucleic acid-templated transcription
ZNF529	ZNF529	1	Down	-0.500819793132683	zinc finger protein 529	GO:0000122 negative regulation of transcription by RNA polymerase II;GO:0045892 negative regulation of DNA-templated transcription;GO:1903507 negative regulation of nucleic acid-templated transcription
ZNF512B	ZNF512B	1	Down	-0.382473206832709	zinc finger protein 512B	GO:1902894 negative regulation of miRNA transcription;GO:2000629 negative regulation of miRNA metabolic process;GO:1902893 regulation of miRNA transcription
ZNF45	ZNF45	1	Down	-0.522464412457826	zinc finger protein 45	GO:0006357 regulation of transcription by RNA polymerase II;GO:0006355 regulation of DNA-templated transcription;GO:1903506 regulation of nucleic acid-templated transcription

## Sheet: spia_N_vs_D
marker	AUC	UpDown	Diff
Caspase_Cascade	0.756363636363636	Down	-1.77314559030303
Hedgehog_Pathway	0.745454545454545	Down	-1.6008326
Erythropoeitin_Pathway	0.735151515151515	Down	-0.73226464969697
GSK3_Pathway	0.70969696969697	Down	-1.66720586909091

## Sheet: spia_A_vs_P
marker	marker2	UpDown	Diff
Androgen_receptor_Pathway	0.75990675990676	Down	-1.47327214452214
DNA_Repair_Mechanisms_Pathway	0.743589743589744	Down	-3.13155958974359
SMAD_p_Pathway	0.741258741258741	Down	-25.3400188974359
JAK_mStat_Pathway	0.741258741258741	Down	-2.71903025641026
PTEN_Pathway	0.738927738927739	Down	-2.18876817948718
Wnt_Pathway_Ctnn.b_Degradation	0.731934731934732	Down	-1.65867137062937
p53_Signaling_m_Pathway_p53_Degradation	0.731934731934732	Down	-1.65867137062937
JAK_mStat_Pathway_JAK_degradation	0.731934731934732	Down	-1.65867137062937
GSK3_Pathway_Degradation	0.731934731934732	Down	-0.829335587412587
Wnt_Pathway	0.72960372960373	Down	-4.50095299067599
SMAD_p_Pathway_Degradation	0.72960372960373	Down	-5.96074563403263
SMAD_m_Pathway_Degradation	0.72960372960373	Down	-5.96074563403263
Cellular_Anti_Apoptosis_Pathway	0.713286713286713	Down	-0.799966249417249
RAS_Pathway	0.724941724941725	Down	-4.71229846620047
SMAD_m_Pathway	0.715617715617716	Down	-22.7689800769231
HGF_Pathway	0.703962703962704	Down	-1.83201535897436
ILK_Pathway_Cell_Motility	0.701631701631702	Down	-0.672292792540793
HGF_Pathway_Cell_adhesion.ell_mirgation	0.701631701631702	Down	-1.35145467599068

## Sheet: spia_R_vs_N
marker	AUC	UpDown	Diff
VEGF_Pathway_Nitric_Oxide_Prodaction	1	Down	-0.8940665
VEGF_Pathway	1	Down	-4.08286183333333
Ubiquitin_Proteasome_Pathway	1	Down	-410.231206333333
TNF_p_Pathway_Gene_expression_Cell_Survival	1	Down	-5.20541033333333
TNF_p_Pathway	1	Down	-7.80811516666667
SMAD_p_Pathway	1	Down	-51.0800203333333
SMAD_m_Pathway	1	Down	-46.8534836666667
RAS_Pathway	1	Down	-21.3468641
mTOR_Pathway_Translation_on	1	Down	-1.34963833333333
mTOR_Pathway_Scanning	1	Down	-5.10640916666667
mTOR_Pathway	1	Down	-11.112554
Mismatch_Repair_Pathway	1	Down	-0.324891666666667
MAPK_Signaling_Pathway_Gene_Expression	1	Down	-2.99637083333333
MAPK_Signaling_Pathway_Cell_Survival_Cell_Inflammation_Apoptosis_Osmoregulation	1	Down	-1.10796166666667
MAPK_Signaling_Pathway	1	Down	-19.4322770333333
MAPK_Family_Pathway	1	Down	-1.2210654
JNK_Pathway_Apoptosis_Inflammation_Tumorogenesis_Cell_Migration	1	Down	-0.138495333333333
JNK_Pathway	1	Down	-1.64996793333333
