# Supplementary material for: Application of Drug Efficiency Index Metric for Analysis of Post-Traumatic Stress Disorder and Treatment Resistant Depression Gene Expression Profiles
Source: MDPI journal article supplement (doi:10.3390/psychoactives2020007), 2023-03-23
Supplement: s1 [file s1 › Supplementary File S6_GSE185855.xlsx]

## Sheet: exp_N_vs_D
SYMBOL	marker	AUC	UpDown	Log2FC	Description	Biological.Process.(GO)
ITPKB	ITPKB	0.798136645962733	Up	0.200363887858074	inositol-trisphosphate 3-kinase B	GO:0033030 negative regulation of neutrophil apoptotic process;GO:0032957 inositol trisphosphate metabolic process;GO:0033029 regulation of neutrophil apoptotic process
CLEC9A	CLEC9A	0.777432712215321	Down	-0.778214769886557	C-type lectin domain containing 9A	GO:0006898 receptor-mediated endocytosis;GO:0001819 positive regulation of cytokine production;GO:0006897 endocytosis
RP11	RP11.61O1.2	0.796066252587992	Up	0.948854296524588	pre-mRNA processing factor 31	GO:0071166 ribonucleoprotein complex localization;GO:0000244 spliceosomal tri-snRNP complex assembly;GO:0000387 spliceosomal snRNP assembly
FGD1	FGD1	0.783643892339545	Up	0.23037199115007	FYVE, RhoGEF and PH domain containing 1	GO:0046847 filopodium assembly;GO:0008360 regulation of cell shape;GO:0051056 regulation of small GTPase mediated signal transduction
SH3RF3	SH3RF3	0.761904761904762	Up	0.569168601026139	SH3 domain containing ring finger 3	GO:0051865 protein autoubiquitination;GO:0032436 positive regulation of proteasomal ubiquitin-dependent protein catabolic process;GO:0046330 positive regulation of JNK cascade
NEURL2	NEURL2	0.779503105590062	Up	0.750178553744467	neuralized E3 ubiquitin protein ligase 2	GO:0016567 protein ubiquitination;GO:0032446 protein modification by small protein conjugation;GO:0070647 protein modification by small protein conjugation or removal
CTB	CTB.12A17.2	0.771221532091097	Up	1.03830045497887	chitobiase	GO:0006030 chitin metabolic process;GO:0006032 chitin catabolic process;GO:1901072 glucosamine-containing compound catabolic process
RP11	RP11.83N9.5	0.772256728778468	Up	0.633063679477048	pre-mRNA processing factor 31	GO:0071166 ribonucleoprotein complex localization;GO:0000244 spliceosomal tri-snRNP complex assembly;GO:0000387 spliceosomal snRNP assembly

## Sheet: exp_A_vs_P
SYMBOL	marker	AUC	UpDown	Log2FC	Description	Biological.Process.(GO)
RP11	RP11.216L13.21	0.819047619047619	Down	-1.09701761878813	pre-mRNA processing factor 31	GO:0071166 ribonucleoprotein complex localization;GO:0000244 spliceosomal tri-snRNP complex assembly;GO:0000387 spliceosomal snRNP assembly
RRAD	RRAD	0.801904761904762	Up	1.0508159213731	RRAD, Ras related glycolysis inhibitor and calcium channel regulator	GO:1901842 negative regulation of high voltage-gated calcium channel activity;GO:1901841 regulation of high voltage-gated calcium channel activity;GO:1901386 negative regulation of voltage-gated calcium channel activity
CDC26	CDC26	0.794285714285714	Up	0.287547118702644	cell division cycle 26	GO:0031145 anaphase-promoting complex-dependent catabolic process;GO:0070979 protein K11-linked ubiquitination;GO:0051445 regulation of meiotic cell cycle
AAMDC	AAMDC	0.798095238095238	Up	0.571605601161597	adipogenesis associated Mth938 domain containing	GO:0045600 positive regulation of fat cell differentiation;GO:0045598 regulation of fat cell differentiation;GO:0045597 positive regulation of cell differentiation
CTD	CTD.2555O16.2	0.801904761904762	Down	-1.15522823314216	Coats disease
RP11	RP11.691N7.6	0.796190476190476	Down	-1.19938585541066	pre-mRNA processing factor 31	GO:0071166 ribonucleoprotein complex localization;GO:0000244 spliceosomal tri-snRNP complex assembly;GO:0000387 spliceosomal snRNP assembly
MRPL22	MRPL22	0.79047619047619	Up	0.421596978155701	mitochondrial ribosomal protein L22	MRPL22
COA6	COA6	0.794285714285714	Up	0.390942950938367	cytochrome c oxidase assembly factor 6	GO:0042774 plasma membrane ATP synthesis coupled electron transport;GO:0008535 respiratory chain complex IV assembly;GO:0017004 cytochrome complex assembly
OBFC1	OBFC1	0.788571428571429	Up	0.257092683761369	STN1 subunit of CST complex	GO:0016233 telomere capping;GO:0032211 negative regulation of telomere maintenance via telomerase;GO:1904357 negative regulation of telomere maintenance via telomere lengthening

## Sheet: exp_R_vs_N
SYMBOL	marker	AUC	UpDown	Log2FC	Description	Biological.Process.(GO)
TFR2	TFR2	0.852083333333333	Up	0.684341134016895	transferrin receptor 2	GO:0140298 endocytic iron import into cell;GO:0033212 iron import into cell;GO:0071281 cellular response to iron ion
PBX1	PBX1	0.854166666666667	Up	1.15704072108465	PBX homeobox 1	GO:0001779 natural killer cell differentiation;GO:0035162 embryonic hemopoiesis;GO:0030325 adrenal gland development
CCDC176	CCDC176	0.852083333333333	Up	1.12358582239745	basal body orientation factor 1	GO:0044458 motile cilium assembly;GO:0060271 cilium assembly;GO:0044782 cilium organization
TAL1	TAL1	0.84375	Up	1.16816164290321	TAL bHLH transcription factor 1, erythroid differentiation factor	GO:0030221 basophil differentiation;GO:1905269 positive regulation of chromatin organization;GO:0035162 embryonic hemopoiesis
FAM210B	FAM210B	0.845833333333333	Up	1.09295122311804	family with sequence similarity 210 member B	GO:0043249 erythrocyte maturation;GO:0045648 positive regulation of erythrocyte differentiation;GO:0048821 erythrocyte development
TPGS2	TPGS2	0.839583333333333	Up	0.57379360194779	tubulin polyglutamylase complex subunit 2	GO:0018095 protein polyglutamylation;GO:0018200 peptidyl-glutamic acid modification;GO:0018193 peptidyl-amino acid modification
TMCC2	TMCC2	0.847916666666667	Up	1.28689535985795	transmembrane and coiled-coil domain family 2	GO:0042982 amyloid precursor protein metabolic process;GO:0019538 protein metabolic process;GO:1901564 organonitrogen compound metabolic process
FBXO7	FBXO7	0.839583333333333	Up	1.09337975752473	F-box protein 7	GO:1903599 positive regulation of autophagy of mitochondrion;GO:1903204 negative regulation of oxidative stress-induced neuron death;GO:1903203 regulation of oxidative stress-induced neuron death
BCL2L1	BCL2L1	0.833333333333333	Up	1.10665976822704	BCL2 like 1	GO:0019048 modulation by virus of host process;GO:0019050 suppression by virus of host apoptotic process;GO:0019054 modulation by virus of host cellular process
GYPB	GYPB	0.827083333333333	Up	2.05700752861897	glycophorin B (MNS blood group)
ADIPOR1	ADIPOR1	0.83125	Up	0.74541292013029	adiponectin receptor 1	GO:0033211 adiponectin-activated signaling pathway;GO:0033210 leptin-mediated signaling pathway;GO:0044320 cellular response to leptin stimulus

## Sheet: spia_N_vs_D
marker	AUC	UpDown	Diff
MAPK_Signaling_Pathway_Cell_Servival_Cell_Militory_Inflammation_Apoptosis_Osmoregulation	0.841614906832298	Down	-0.707667377846791
ILK_Pathway_Induced_cell_proliferation	0.841614906832298	Up	0.176916514492754
TRAF_p_Pathway_IKBs_Degradation	0.806935817805383	Up	0.307902027950311
TRAF_p_Pathway	0.806935817805383	Up	0.307902027950311
TRAF_m_Pathway_IKBs_Degradation	0.806935817805383	Up	0.307902027950311
TRAF_m_Pathway	0.806935817805383	Up	0.307902027950311
TNF_p_Pathway_IKBs_degradation	0.806935817805383	Up	0.307902027950311
MAPK_Family_Pathway_IKBs_Degradation	0.806935817805383	Up	0.307902027950311
IGF1R_Signaling_Pathway_IKB_Degradation	0.806935817805383	Up	0.307902027950311
CD40_Pathway_IKBs_Degradation	0.806935817805383	Up	0.461853720496894
CD40_Pathway_Gene_Expression	0.806935817805383	Up	0.153951026915114
IP3_Pathway_Gene_Expression	0.739130434782609	Down	-0.177506347826087
Glucocorticoid_Receptor_Pathway_Gene_Expression	0.717391304347826	Down	-0.3112165
MAPK_Family_Pathway	0.719461697722567	Down	-8.23730139544513
IL_6_Pathway	0.708592132505176	Up	0.361134291925466

## Sheet: spia_A_vs_P
marker	AUC	UpDown	Diff
Chemokine_Pathway_Internalization_Degradation_Recycling	0.8	Up	0.70684264
GSK3_Pathway	0.76	Down	-2.31272440761905
EGFR1_Pathway	0.769523809523809	Down	-4.10488133904762
cAMP_Pathway_Regulation_of_Cytoskeleton	0.76	Up	0.711815186666667
cAMP_Pathway_Protein_Retention	0.76	Up	0.711815186666667
cAMP_Pathway_Oncogenesis	0.76	Up	0.711815186666667
cAMP_Pathway_Myocardial_Contraction	0.76	Up	0.711815186666667
cAMP_Pathway_Glycogen_Synthesis	0.76	Up	0.711815186666667
cAMP_Pathway_Degradation_of_Cell_Cycle_Regulators	0.76	Up	0.711815186666667
cAMP_Pathway_Cell_Survival	0.76	Up	0.711815186666667
cAMP_Pathway_Cell_Proliferation	0.76	Up	0.711815186666667
cAMP_Pathway_Cardiovascular_Homeostasis	0.76	Up	0.711815186666667
cAMP_Pathway_Axonal_Growth	0.76	Up	0.711815186666667
ILK_Pathway_Cell_Motility	0.750476190476191	Up	1.24829036380952
ILK_Pathway_G2_phase_arrest	0.754285714285714	Up	1.10803410095238
ILK_Pathway_Cell_Migration.Retraction	0.754285714285714	Up	1.10803410095238
ILK_Pathway_Cell_cycle_proliferation	0.754285714285714	Up	1.10803410095238
ILK_Pathway_Apoptosis	0.754285714285714	Up	2.21606827428571
DNA_Repair_Mechanisms_Pathway	0.742857142857143	Down	-1.68630942857143
MAPK_Family_Pathway_Gene_Expression	0.72952380952381	Down	-0.486278106666667
Androgen_receptor_Pathway_Sexual_Differentiation_._Sexual_Maturation_at_Puberty	0.721904761904762	Down	-0.98572124952381
Androgen_receptor_Pathway_Prostate_Differentiation_._Development	0.721904761904762	Down	-0.98572124952381
Androgen_receptor_Pathway_Histone_Modification	0.721904761904762	Down	-0.98572124952381
NGF_m_Pathway	0.72	Down	-1.2367288
JNK_Pathway_Insulin_signaling	0.72	Down	-1.48407468
Integrin_Signaling_Pathway_Cytoskeleton_contraction_integrin_modulation_cell_invasion_and_migration	0.72	Down	-0.989383
Integrin_Signaling_Pathway_Cell_survival	0.72	Down	-1.2367288
Chemokine_Pathway_Cell_Activation	0.72	Down	-0.4946916

## Sheet: spia_R_vs_N
marker	AUC	UpDown	Diff
MAPK_Signaling_Pathway_Cell_Survival_Cell_Inflammation_Apoptosis_Osmoregulation	0.966666666666667	Down	-0.1200865
ILK_Pathway_Induced_cell_proliferation	0.966666666666667	Up	0.0300209
ILK_Pathway_Regulation_of_junction_assembly_of_desmosomes	0.875	Up	3.5047725625
JNK_Pathway	0.86875	Down	-3.79621735416667
Interferon_Pathway_Gene_Expression	0.852083333333333	Up	3.5949699875
Mitochondrial_Apopotosis_m_Pathway	0.847916666666667	Up	4.274768925
PTEN_Pathway	0.822916666666667	Up	2.57777004166667
ERK_Signaling_Pathway	0.835416666666667	Up	4.3697557375
Erythropoeitin_Pathway	0.802083333333333	Up	4.20978124166667
GSK3_Pathway_Gene_Expression	0.8125	Down	-0.58485925
Androgen_receptor_Pathway	0.816666666666667	Up	4.98807370833333
JNK_Pathway_Apoptosis_Inflammation_Tumorogenesis_Cell_Migration	0.810416666666667	Down	-0.283035808333333
Interferon_Pathway	0.7875	Up	4.007001475
HIF1Alpha_Pathway	0.789583333333333	Up	11.7256372041667
Cellular_Anti_Apoptosis_Pathway	0.779166666666667	Up	3.58541125833333
AKT_Pathway	0.745833333333333	Up	1.56955133333333
RNA_Polymerase_II_Complex_Pathway	0.7625	Up	16.4295005541667
PPAR_Pathway	0.760416666666667	Up	11.2209214958333
HGF_Pathway_Cell_adhesion.ell_mirgation	0.758333333333333	Up	2.39996985416667
