# Supplementary material for: Application of Drug Efficiency Index Metric for Analysis of Post-Traumatic Stress Disorder and Treatment Resistant Depression Gene Expression Profiles
Source: MDPI journal article supplement (doi:10.3390/psychoactives2020007), 2023-03-23
Supplement: s1 [file s1 › Supplementary File S8.csv]

Gene	LFC	pValue
ABCB10	-0.850669011	0.031411228
ABCE1	-0.847911456	0.029853129
ABHD13	-0.895796846	0.032056215
ABRACL	-0.541055218	0.041601404
ACADM	-0.816125524	0.02964492
ACBD3	-0.577086465	0.03423172
ACBD5	-0.681480385	0.02964492
ACRC	-0.601953591	0.031322811
ACTR2	-0.567575752	0.038626589
ACVR1	-0.650018368	0.033219804
ACYP1	-0.618666988	0.038613258
ADAM1A	-0.952366681	0.030189113
ADO	-0.578463597	0.03565226
AGL	-0.997318198	0.035182356
AGPAT5	-0.67056339	0.035306876
AGPS	-0.588641876	0.03802621
AHSA2	-0.539907797	0.035306876
AIM2	-0.721625694	0.02964492
AIMP1	-0.684230468	0.035306876
AJ420595	-1.279986168	0.02964492
AK025117	-0.534726744	0.046574608
AK055910	-0.708337302	0.03802621
AK3	-0.673763738	0.032496988
ALG13	-0.522374192	0.046327353
ALKBH8	-0.571060575	0.02964492
AMIGO2	-0.692353418	0.044551114
ANAPC4	-0.619472523	0.033756839
ANKMY2	-0.537515605	0.038558088
ANKRA2	-0.72301545	0.040134394
ANKRD12	-0.714284653	0.038558088
ANKRD13C	-0.779046138	0.031155866
ANKRD32	-0.567030009	0.033049829
ANKRD36B	-1.307222221	0.02964492
ANP32E	-0.671892645	0.045809704
APPL1	-0.616401363	0.037832111
APPL2	-1.026634959	0.02964492
ARFIP1	-0.56595313	0.039948877
ARGLU1	-0.569250362	0.045399028
ARHGAP12	-0.889910947	0.030189113
ARHGAP18	-0.593870975	0.043870347
ARHGEF3	-0.659885947	0.035306876
ARID4A	-0.665189176	0.044570445
ARL1	-0.646775394	0.02964492
ARL13B	-0.726396365	0.033219804
ARL6IP5	-0.503254903	0.040035808
ARMCX3	-0.638263635	0.038375489
ARRDC3	-0.657631401	0.03423172
ASF1A	-0.774847223	0.030189113
ASNSD1	-0.688284517	0.036380752
ASUN	-0.681513754	0.033219804
ATAD1	-0.67743722	0.043042448
ATAD2	-0.602186549	0.033219804
ATF1	-0.744466508	0.034221654
ATF2	-0.520665864	0.029853129
ATG4C	-0.727353536	0.035617386
ATG5	-0.756541364	0.030768847
ATP2B1	-0.638855214	0.033827991
ATP7A	-0.578539688	0.038519132
ATP8B4	-0.880127446	0.03208664
AUH	-0.512755684	0.035306876
BAGE2	-0.627562584	0.04722904
BANK1	-0.582259384	0.046365367
BAZ1A	-0.574270066	0.035617386
BBS10	-0.826839753	0.031322811
BCLAF1	-0.622050139	0.03565226
BDP1	-0.676327101	0.02964492
BET1	-0.56150986	0.044542384
BIRC2	-0.738145394	0.031411228
BIRC3	-0.775090665	0.030245676
BMI1	-0.708862606	0.04764084
BORA	-0.719860393	0.02964492
BRCC3	-0.708594856	0.030189113
BTAF1	-0.644963998	0.043217241
BTBD1	-0.577273953	0.03194243
BTBD3	-0.617695213	0.036228367
BZW1	-0.561936895	0.035913224
C10orf32	-0.713715241	0.04722904
C12orf4	-0.56409764	0.030245676
C14orf142	-0.722758204	0.040134394
C1GALT1	-0.518120905	0.036412837
C1orf174	-0.505581531	0.037632437
C1orf52	-0.501492931	0.044126805
C20orf197	-0.702461418	0.047640582
C21orf91	-0.50811683	0.047551788
C2CD5	-0.72517159	0.031148487
C4orf46	-0.543654332	0.048030469
C5orf24	-0.574313485	0.02964492
C6orf120	-0.676444134	0.03802621
C6orf211	-0.871002223	0.029853129
C7orf31	-0.569196983	0.02964492
C9orf41	-0.502682346	0.038519132
CAAP1	-0.703449144	0.032208426
CAPN7	-0.850009957	0.02964492
CBLL1	-0.516324545	0.049151883
CBWD1	-0.777936101	0.02964492
CBX3	-0.576320884	0.039769503
CCDC146	-0.628266579	0.031322811
CCDC186	-0.884370604	0.02964492
CCDC43	-0.518384019	0.032056215
CCDC66	-0.526503707	0.037330535
CCDC82	-0.54277037	0.031322811
CCDC91	-0.652635554	0.039243199
CCNT2	-0.636436553	0.031322811
CCT2	-0.599368103	0.04722904
CCT6A	-0.550588993	0.034221654
CD164	-0.612561104	0.035068974
CD226	-0.643123553	0.033219804
CDC37L1	-0.588004739	0.033219804
CDC40	-0.703136419	0.02964492
CDC7	-0.76661247	0.037825166
CDK17	-0.604374112	0.035867725
CDK8	-0.540972628	0.03565226
CDKN2AIP	-0.820184055	0.02964492
CEBPZ	-0.672566562	0.030245676
CENPC	-0.783340194	0.031155866
CENPK	-1.502237166	0.02964492
CEP120	-0.699440884	0.02964492
CEP135	-0.55140334	0.03565226
CEP192	-0.687248657	0.044087405
CEP57	-0.805169218	0.029853129
CETN3	-1.154323916	0.047858492
CHMP5	-0.813781203	0.038613258
CLEC2D	-0.729067928	0.03423172
CLIC2	-0.579181179	0.031800508
CLK1	-1.165226942	0.02964492
CMPK2	-1.361645674	0.02964492
CMTR2	-0.950578791	0.031249506
CNOT6	-0.569403371	0.036228367
CNOT8	-0.506155346	0.032056215
COG6	-0.511593905	0.030189113
COMMD2	-0.502660165	0.03565226
CPOX	-0.789361708	0.02964492
CPSF2	-0.530569271	0.031322811
CRBN	-0.597322149	0.046574608
CREBZF	-0.567277977	0.045912462
CRY1	-0.882232491	0.02964492
CRYZ	-1.006591926	0.033219804
CSGALNACT2	-0.524766546	0.03423172
CSNK1G3	-0.603057425	0.02964492
CTDSPL2	-0.575137069	0.042176906
CWC22	-0.629905681	0.031155866
CWC27	-0.595279406	0.02964492
CYCS	-0.550449381	0.041601404
CYP20A1	-0.533546971	0.031865709
CYSLTR1	-0.527883803	0.031155866
DCAF13	-0.533647343	0.02964492
DCK	-0.904070769	0.030189113
DDHD2	-0.669084264	0.045912462
DDX1	-0.508427794	0.033219804
DDX26B	-0.656548455	0.036325955
DDX60	-1.0582155	0.02964492
DEK	-0.820430497	0.030189113
DENND4A	-0.639798593	0.033219804
DHX15	-0.528292822	0.046952373
DHX29	-0.56366472	0.035296446
DHX9	-0.753429396	0.030189113
DLAT	-0.585439577	0.032056215
DMTF1	-0.711399478	0.029853129
DNAAF2	-0.600333544	0.032056215
DNAJA1	-0.537881991	0.038558088
DNAJB14	-0.904366346	0.031155866
DNAJB9	-0.700117707	0.034693277
DNAJC10	-0.592306896	0.03711309
DNAJC15	-0.597641488	0.033219804
DNAJC25	-0.551019097	0.031155866
DNTTIP2	-0.608272784	0.03326944
DONSON	-0.720577796	0.02964492
DPM1	-0.646743905	0.046963619
DRAM2	-0.630625727	0.03194243
DYNLT3	-0.688412368	0.044126805
E2F5	-0.53595463	0.045185537
EBAG9	-0.547389468	0.039139853
EBLN3	-0.656412995	0.038613258
EDEM3	-0.809275158	0.02964492
EEA1	-0.501012293	0.038613258
EED	-0.620036659	0.038375489
EFCAB7	-0.832186125	0.034221654
EHBP1	-0.505865224	0.045912462
EID1	-0.732988985	0.02964492
EIF2A	-0.509955131	0.045253924
EIF3E	-0.544393105	0.035306876
EIF3J	-0.504951343	0.045997528
EIF4A2	-0.571437782	0.031155866
EMC2	-0.939511209	0.02964492
ENOPH1	-0.644318103	0.045907459
ENPP4	-1.006087281	0.032056215
EOGT	-0.814104761	0.039546092
EPS15	-0.517562858	0.044412347
EPS8	-0.813134122	0.03802621
EPSTI1	-0.760447862	0.040738336
ERCC5	-0.52953428	0.038626589
ERO1LB	-0.544697258	0.035617386
ESCO1	-0.948477321	0.02964492
ESF1	-0.844879052	0.033219804
ETAA1	-0.746211349	0.042176307
ETFDH	-0.623913761	0.031155866
ETNK1	-0.563098975	0.040142099
EXOC1	-0.629739717	0.03565226
EXOC5	-0.609802973	0.032691695
EXOC8	-0.748173311	0.044138745
EZH2	-0.701694174	0.037128704
FAM102B	-0.546053551	0.045912462
FAM122B	-0.763164953	0.02964492
FAM133B	-0.693919606	0.045997528
FAM13B	-0.554353257	0.04495314
FAM172A	-0.512209655	0.046297211
FAM175A	-0.828392229	0.039663459
FAM179B	-0.910375989	0.037632437
FAM198B	-0.514693744	0.044126805
FAM214A	-0.521986871	0.040459898
FAM35A	-0.769575883	0.038519132
FAM3C	-0.715223133	0.031155866
FAM63B	-0.500745973	0.03565226
FAM72A	-0.677250841	0.02964492
FAM73A	-0.595470451	0.036806596
FAM76B	-0.599067491	0.038613258
FANCL	-1.134963024	0.02964492
FAR1	-0.813684541	0.033162976
FAS	-0.692613936	0.044126805
FASTKD1	-0.627348584	0.044228573
FASTKD3	-0.804076081	0.02964492
FBXO45	-0.538597452	0.031155866
FBXO5	-0.58041201	0.035444335
FBXO8	-0.519455841	0.045912462
FGFR1OP2	-0.508183036	0.039887488
FGL2	-0.672110928	0.02964492
FIGNL1	-0.660111492	0.037128704
FLJ31306	-0.724213525	0.033219804
FMR1	-0.699418909	0.04385604
FOPNL	-0.556241961	0.031155866
FPGT	-0.94156362	0.031322811
FUBP1	-0.59192026	0.031155866
FUT8	-0.521132312	0.030189113
FXR1	-0.564089986	0.032056215
FYTTD1	-0.630760239	0.031865709
FZD6	-0.844136414	0.03802621
G2E3	-0.736341184	0.031155866
GABPA	-0.6601452	0.02964492
GALNT12	-0.534042783	0.03565226
GALNT7	-0.636077738	0.044653998
GBAS	-0.565922516	0.039370778
GBP1	-0.597830699	0.048185295
GCH1	-0.604991221	0.040304791
GGCT	-0.51698325	0.032056215
GIMAP7	-0.743574753	0.029853129
GIN1	-0.822278581	0.040104666
GLCE	-0.606909342	0.032208426
GLMN	-0.537431685	0.033219804
GLOD4	-0.535204821	0.047640582
GNL2	-0.606044621	0.02964492
GNPDA2	-0.772134979	0.033219804
GOLGA4	-0.540844526	0.043338513
GOLGA6L4	-0.943805458	0.033219804
GOLGA8CP	-0.525557489	0.03802621
GOLT1B	-0.617080411	0.03565226
GORAB	-1.205559787	0.02964492
GPAM	-0.602840045	0.038558088
GPBP1	-0.638017944	0.031155866
GPR183	-0.620355036	0.042176307
GPR34	-0.703788462	0.047108666
GSAP	-0.688052326	0.043074394
GXYLT1	-0.606700712	0.032496988
HACE1	-1.009323645	0.029853129
HAT1	-0.884407284	0.039663459
HAUS3	-0.798764906	0.035394871
HAUS6	-0.909693674	0.029853129
HBS1L	-0.59348639	0.02964492
HCFC2	-0.556423993	0.044544247
HCG11	-0.744562413	0.038613258
HDHD2	-0.575553608	0.043074394
HERC2P2	-0.517129114	0.041364466
HERC4	-0.554039897	0.04722904
HERC5	-0.867399278	0.038375489
HIBCH	-0.577869719	0.03423172
HMGB1	-0.632696353	0.037923969
HNRNPH2	-0.514916798	0.047614317
HNRNPU-AS1	-0.865209914	0.02964492
HPS5	-0.555593171	0.034693277
HSF5	-0.511025521	0.040738336
HSP90AA1	-0.861885279	0.02964492
HSP90B1	-0.586191255	0.02964492
HSPA13	-0.913674559	0.033219804
HSPH1	-0.511819906	0.03565226
HTATSF1	-0.625523285	0.02964492
IFI44	-1.542237277	0.02964492
IFI44L	-1.289168748	0.037512036
IFIT1	-1.387232217	0.02964492
IFIT2	-0.922688177	0.02964492
IFIT5	-0.660195097	0.035394871
IFT80	-0.674646323	0.02964492
IGJ	-1.572507538	0.02964492
IL15	-0.761693371	0.02964492
IMPA1	-0.749412347	0.040297799
IMPACT	-0.715168546	0.02964492
INSIG2	-0.803462811	0.032894939
ITGA4	-0.963678004	0.02964492
ITGAV	-0.932325297	0.03802621
JAK2	-0.685368679	0.031322811
JKAMP	-0.656441092	0.03060655
JPX	-0.939325494	0.035306876
KBTBD6	-0.654878356	0.046070779
KBTBD8	-0.836867672	0.043867956
KCNA3	-1.065363425	0.02964492
KCTD9	-0.580358036	0.046574608
KDM6A	-0.500218948	0.039243199
KIAA1033	-0.889553836	0.029853129
KIAA1468	-0.643909244	0.038613258
KIAA1551	-0.79033044	0.038558088
KIF21A	-0.680761607	0.041066054
KIF2A	-0.661220665	0.02964492
KIF3A	-0.556241454	0.034693277
KLF10	-0.645417014	0.033162976
KLHL24	-0.537528481	0.038613258
KLHL5	-0.617514482	0.037746843
KPNA5	-0.717144113	0.040104666
KRBOX4	-0.503468178	0.039243199
KRCC1	-0.885665321	0.02964492
KTN1	-0.785074275	0.030189113
LACTB2	-0.671820484	0.033219804
LAMTOR3	-0.72268284	0.034533691
LAP3	-0.585262351	0.04722904
LCORL	-0.661889732	0.044892066
LDHB	-0.565669474	0.041944681
LEMD3	-0.74697846	0.03565226
LIAS	-0.578701196	0.035394871
LIN7C	-0.531734286	0.046574608
LINC00342	-0.573606294	0.031054761
LINC00621	-0.699565672	0.033219804
LINC00657	-0.547479445	0.03565226
LINC01215	-0.816749684	0.044228573
LIPT1	-0.627855607	0.045912462
LOC100132352	-0.50149288	0.047609598
LOC100288675	-0.548451626	0.045912462
LOC100289230	-0.543776023	0.035182356
LOC101928625	-0.589895401	0.039679856
LOC101929841	-0.523556177	0.02964492
LOC102606465	-0.800373729	0.02964492
LOC285147	-0.604899259	0.047059103
LOC389765	-0.793259501	0.02964492
LOC93622	-0.614860978	0.029853129
LRIF1	-0.733128798	0.032894939
LSM8	-0.664412384	0.039903183
LTN1	-0.547504889	0.033219804
LTV1	-0.653169216	0.02964492
LUC7L3	-0.560377547	0.046855733
LYPLA1	-0.668877836	0.038613258
MALAT1	-0.720911183	0.039887488
MALT1	-0.677875656	0.033049829
MAP3K1	-0.632182668	0.033219804
MAP3K7	-0.587606496	0.030245676
MAP4K3	-1.242457112	0.02964492
MAP4K5	-0.836130143	0.02964492
01-Mar	-0.555621199	0.031148487
MASTL	-0.653198392	0.038142613
MATR3	-0.500659993	0.02964492
MBIP	-0.524022272	0.035617386
MDFIC	-0.669258243	0.031155866
MDM1	-0.693606334	0.02964492
METAP2	-0.530059773	0.037832111
METTL18	-0.728319279	0.049408725
METTL2A	-0.642531375	0.035306876
METTL4	-0.52736147	0.038558088
MFN1	-0.617267399	0.035306876
MFSD6	-0.665718615	0.030189113
MFSD8	-0.593832866	0.03802621
MGAT4A	-0.586420979	0.044653998
MGC70870	-0.554427177	0.033219804
MIB1	-0.696144463	0.039882847
MICU2	-0.830770357	0.02964492
MIER3	-0.567088817	0.046070779
MINA	-0.531397088	0.02964492
MIR3916	-0.806463619	0.043118411
MIS18BP1	-0.662961729	0.02964492
MITD1	-0.699573454	0.033219804
MOB1A	-0.730811565	0.02964492
MOB1B	-0.974761194	0.02964492
MORC3	-0.651701125	0.03802621
MORF4L2	-0.775402012	0.02964492
MPHOSPH10	-0.601523909	0.030189113
MRFAP1L1	-0.696817339	0.033321678
MRPL19	-0.580365732	0.031249506
MRPL39	-0.502327183	0.041015523
MS4A1	-0.765848064	0.045021629
MSH2	-0.768192305	0.038613258
MST4	-0.574070927	0.04591571
MTERF2	-0.518445348	0.048711197
MTERF3	-0.674973208	0.041751049
MTF2	-0.58589288	0.035306876
MTIF2	-0.635683063	0.035867725
MTO1	-0.569353977	0.033756839
MUT	-0.557836218	0.033219804
MZT1	-0.513427312	0.040392798
NAA16	-0.688843353	0.033219804
NAA50	-0.565493323	0.04764084
NABP1	-0.667519597	0.036325955
NADK2	-0.571627852	0.040035808
NAE1	-0.611469652	0.045912462
NAP1L1	-0.591946216	0.033321678
NAP1L3	-1.062590502	0.033219804
NBN	-0.530965183	0.033091941
NCEH1	-0.698380353	0.035867725
NCK1	-0.672079555	0.030245676
NDUFA5	-0.700045443	0.033827991
NEDD1	-0.607403212	0.044312444
NEMF	-0.696045759	0.032056215
NIPSNAP3A	-0.80330384	0.042176906
NLK	-0.561455596	0.02964492
NMD3	-0.703288036	0.037330535
NMRK1	-0.558727003	0.044286401
NNT-AS1	-0.678602945	0.040142099
NOC3L	-0.805896057	0.035306876
NOP58	-0.658705436	0.045217977
NPHP3	-0.519929067	0.038519132
NPM1	-0.51332273	0.047640582
NPTN	-0.540403617	0.048251608
NR1D2	-0.89655486	0.043042448
NRIP1	-0.865753855	0.032056215
NSA2	-0.56437978	0.042522204
NT5C1B-RDH14	-0.763581714	0.029853129
NUCB2	-0.565544185	0.042766908
NUDT15	-0.543077301	0.047980225
NUDT21	-0.727060921	0.029853129
NUP155	-0.504027145	0.038558088
NUP35	-0.702318923	0.035306876
NUS1	-0.547596461	0.03565226
OMA1	-0.777836547	0.030983674
OPA1	-0.519403009	0.040104666
OTUD6B	-0.935150084	0.035867725
OXCT1	-0.637243505	0.035394871
OXR1	-0.639619861	0.02964492
OXSM	-0.500016472	0.04495314
P2RY10	-0.733107139	0.033219804
PAIP1	-0.708958343	0.032056215
PAN3-AS1	-0.620536368	0.04495314
PAXBP1	-0.56203524	0.02964492
PBDC1	-0.518264119	0.033162976
PCED1B-AS1	-0.508067989	0.02964492
PCMT1	-0.533387374	0.035306876
PCNP	-0.68936105	0.032056215
PDHX	-0.66352537	0.039243199
PDIK1L	-0.931021637	0.030189113
PDK4	-0.617405165	0.02964492
PDP1	-0.922917353	0.02964492
PDS5A	-0.57280404	0.03318023
PEX1	-0.583448092	0.035394871
PEX3	-0.544154858	0.043115233
PGBD4	-0.6956797	0.02964492
PGRMC2	-0.50663348	0.03565226
PHF10	-0.504580245	0.046599773
PHKB	-0.622338195	0.02964492
PHOSPHO2	-1.082412639	0.035867725
PHTF2	-0.56706449	0.02964492
PI4K2B	-0.657361927	0.02964492
PIGA	-0.67955975	0.043499006
PIGF	-0.601281939	0.02964492
PIGW	-0.515804589	0.038613258
PLEKHA1	-0.75820825	0.032894939
PLEKHF2	-0.743196265	0.035617386
PLRG1	-0.585002152	0.033219804
PNMA1	-0.633493715	0.033219804
PNN	-0.53265519	0.033219804
PNPLA8	-0.6687324	0.035517426
PNPT1	-0.815822957	0.031322811
PNRC2	-0.607497626	0.02964492
POLI	-0.929722258	0.030245676
POT1	-0.701159578	0.032496988
PPAPDC2	-0.579815716	0.033219804
PPIG	-0.672754081	0.031155866
PPIL1	-0.538007	0.047451977
PPIL4	-1.032897912	0.030189113
PPM1B	-0.841776589	0.02964492
PPP3CB	-0.511508794	0.03423172
PPP4R2	-0.549675664	0.038558088
PPWD1	-0.711837422	0.02964492
PRIM1	-0.500494106	0.039277714
PRIMPOL	-0.698941299	0.02964492
PRKAB2	-0.513623715	0.02964492
PRKRIR	-0.673397914	0.044892066
PRMT3	-0.826394322	0.033219804
PRMT6	-0.97808879	0.02964492
PRMT9	-0.559072147	0.034533691
PRNP	-0.641499091	0.02964492
PRPF39	-0.961963683	0.036806596
PRPF4B	-0.656836359	0.038282522
PSMC6	-0.973811822	0.038613258
PTAR1	-0.73872878	0.02964492
PTBP2	-0.756362237	0.030818594
PTER	-0.610247857	0.036412837
PTGES3	-0.519265248	0.038558088
PTPLB	-0.735181934	0.02964492
PTPN22	-0.553270043	0.030983674
RAB11FIP2	-0.524610468	0.039243199
RAB28	-0.542449333	0.03326944
RAB5A	-0.547416365	0.042338837
RABGGTB	-0.707156602	0.032496988
RABL3	-0.50853473	0.029853129
RAD21	-0.672587882	0.033219804
RAN	-0.646901267	0.035306876
RANBP2	-0.594109286	0.040268212
RANBP6	-0.996117114	0.033219804
RANBP9	-0.564427461	0.032056215
RAP1B	-0.665437118	0.030245676
RAP2C	-0.660499556	0.039887488
RASA1	-0.730779734	0.03194243
RASA2	-0.619375302	0.046924331
RB1	-0.516260123	0.032056215
RB1CC1	-0.671017009	0.045690406
RBAK	-0.763483497	0.032056215
RBBP8	-0.644714523	0.043042448
RBL2	-0.536540083	0.029853129
RBM12B	-0.875973033	0.02964492
RBM41	-0.628074629	0.031155866
RCHY1	-0.56105367	0.035306876
RCN1	-0.559270369	0.032056215
RCN2	-0.86897018	0.030189113
RECQL	-0.923394815	0.02964492
REEP3	-0.51115592	0.033219804
RFK	-0.64821926	0.037825166
RFX7	-0.811141752	0.02964492
RHNO1	-0.508708736	0.033219804
RINT1	-0.677336913	0.032590473
RIOK2	-0.59918044	0.033756839
RNF139	-0.662083939	0.031155866
RNF182	-1.393875625	0.040381623
RNF19A	-0.509830003	0.02964492
RNFT1	-0.555522864	0.033355781
RP11-124L9.5	-0.831687739	0.030189113
RP11-196G18.24	-0.69284575	0.03802621
RP11-28F1.2	-0.642198545	0.03802621
RP11-350F4.2	-0.501727572	0.038558088
RP11-488L18.10	-1.342622866	0.02964492
RP11-846E15.2	-0.567590741	0.04755837
RP4-614O4.12	-0.642884655	0.049989151
RPA3	-0.511796035	0.040104666
RPA3OS	-0.62365221	0.03525689
RPAP3	-0.657091156	0.02964492
RPGR	-0.550891722	0.03802621
RPS6KC1	-0.520328792	0.032056215
RRN3	-0.713096434	0.031155866
RSAD2	-1.603530059	0.02964492
RSRC2	-0.568494599	0.02964492
RWDD3	-0.786524904	0.030245676
RWDD4	-0.78026155	0.03423172
RYK	-0.50880674	0.034533691
S1PR1	-0.649724894	0.032056215
SACS	-1.10102632	0.035306876
SAMD9	-0.784280988	0.02964492
SAMD9L	-0.675935988	0.031135875
SAMSN1	-0.624134036	0.031135875
SARAF	-0.52348367	0.035306876
SARNP	-0.568577895	0.039887488
SBDS	-0.860591011	0.02964492
SCAMP1	-0.595748131	0.030189113
SCOC	-0.955605624	0.043867956
SCP2	-0.51818755	0.039243199
SCYL2	-0.645958736	0.033219804
SDPR	-0.670051736	0.037255966
SEC23A	-0.645650201	0.031155866
SENP6	-0.799769258	0.02964492
SENP7	-1.00412179	0.02964492
SEPSECS-AS1	-0.543368402	0.038558088
SF3B1	-0.615302585	0.030189113
SGMS1	-0.831595566	0.046924331
SGPP1	-0.975126009	0.03003121
SHPRH	-0.893189427	0.033827991
SIKE1	-0.565369544	0.02964492
SIRT1	-0.586498385	0.045217977
SLAIN1	-0.792195812	0.040104666
SLC16A7	-0.693856832	0.043870347
SLC19A2	-0.885713739	0.043093108
SLC25A32	-0.686731069	0.047341629
SLC25A40	-0.528132625	0.031155866
SLC25A46	-0.70880114	0.044551114
SLC30A5	-0.554220447	0.033219804
SLC30A9	-0.553084188	0.031322811
SLC35A5	-0.638451514	0.038613258
SLC38A6	-0.731785708	0.03565226
SLC39A6	-0.550068377	0.035306876
SLFN11	-0.555678864	0.0361539
SLFN12	-0.612760019	0.030245676
SLFN5	-0.697360569	0.02964492
SLU7	-0.554011779	0.03423172
SMAD5	-0.523237526	0.037512036
SMARCA5	-0.824651566	0.02964492
SMARCAD1	-0.677530029	0.030189113
SMC3	-0.708641543	0.02964492
SMC4	-0.608330983	0.02964492
SMC5	-0.5981441	0.02964492
SMC6	-0.586465529	0.037832111
SMEK1	-0.513784356	0.047108666
SMIM15	-0.876118938	0.03194243
SMN1	-0.753385692	0.032056215
SMNDC1	-0.579458633	0.049151883
SNAPC1	-0.586063295	0.039663459
SNAPC3	-0.522128662	0.035182356
SNORD50A	-0.780736789	0.03060655
SNRPD1	-0.571217536	0.037632437
SNX14	-0.616477701	0.03326944
SNX16	-0.695893028	0.043297072
SNX2	-0.589409284	0.035617386
SNX30	-0.511044554	0.035411735
SNX4	-0.687904284	0.034533691
SPAST	-0.645823795	0.038519132
SPDL1	-0.674759588	0.031322811
SPIN4	-1.050714707	0.031322811
SPRTN	-0.669867547	0.02964492
SRP72	-0.509575058	0.031865709
SRP9	-0.799618484	0.035306876
SRSF10	-0.781589818	0.02964492
SRSF11	-0.515905763	0.046963619
SRSF7	-0.53936482	0.029853129
SSB	-0.72583875	0.02964492
STAMBPL1	-0.50266493	0.031322811
STARD4	-0.621639491	0.043042448
STK39	-0.648595138	0.03423172
STT3B	-0.635744924	0.040968085
STXBP3	-0.734595778	0.031865709
STYX	-0.635719829	0.02964492
SUB1	-0.741444784	0.046070779
SUCLA2	-0.924892544	0.02964492
SUCLG2	-0.567591977	0.045809704
SUCO	-0.88045478	0.031155866
SUZ12P	-0.639886518	0.040604741
SVIP	-0.586215375	0.035306876
SYNJ2BP	-0.630100088	0.039692315
TAF1A	-0.881661085	0.040304791
TAF1B	-0.576463212	0.030189113
TBC1D15	-0.572439004	0.045217977
TBC1D4	-0.704496244	0.046963619
TBK1	-0.57779022	0.043104626
TC2N	-0.609532565	0.047059103
TCEAL1	-0.576904618	0.045912462
TCEAL8	-0.683156239	0.038048205
TDG	-0.645116882	0.039437247
TFEC	-0.848993022	0.033827991
THAP9-AS1	-0.962607949	0.02964492
THUMPD1	-0.642949118	0.039679856
TIA1	-0.601944939	0.031865709
TIGD2	-0.789922377	0.03565226
TIGD7	-0.681727149	0.038390175
TIPIN	-0.519267736	0.047694029
TMED2	-0.501708759	0.042054111
TMED7	-0.690208263	0.032056215
TMEM123	-0.744883513	0.033827991
TMEM128	-0.670669982	0.045912462
TMEM14C	-0.563155587	0.045912462
TMEM168	-0.773378501	0.02964492
TMEM181	-0.663976019	0.049989151
TMEM209	-0.523844519	0.033219804
TMEM263	-0.846728835	0.046260606
TMEM30A	-0.620007369	0.045809704
TMEM38B	-0.548864741	0.033219804
TMEM87B	-0.681720296	0.033321678
TMX1	-0.998921896	0.02964492
TMX3	-0.637323938	0.031155866
TNFAIP8	-0.53328408	0.045907459
TOMM70A	-0.505188901	0.04878313
TPR	-0.630418412	0.031322811
TRAPPC13	-0.581314215	0.040104666
TRAPPC6B	-0.820477838	0.029853129
TRIM23	-0.711201583	0.034693277
TRIM52	-0.564801171	0.045157524
TRIM59	-0.825358714	0.039718492
TRMT11	-1.012396064	0.038558088
TRMT13	-0.716545715	0.04719698
TRMT1L	-0.628080337	0.035617386
TRNT1	-0.70430912	0.02964492
TSNAX	-0.823624316	0.030245676
TSPYL4	-0.621749833	0.033219804
TTC14	-0.96631674	0.02964492
TTC3	-0.61291523	0.044350708
TTC37	-0.642026468	0.036412837
TVP23B	-1.073005194	0.02964492
U2SURP	-0.637228822	0.033219804
UBA5	-0.647012891	0.031155866
UBE2E1	-0.5102579	0.043115233
UBE2Q2	-0.815345583	0.030189113
UFL1	-0.507671458	0.039663459
UFM1	-0.783821993	0.02964492
UHMK1	-0.594780064	0.031322811
UPF2	-0.592531515	0.035306876
UPRT	-0.55824164	0.041015523
USO1	-0.599238517	0.036005766
USP1	-0.937560882	0.02964492
USP16	-0.744784266	0.031155866
USP32P2	-0.668011066	0.040304791
USP47	-0.657483033	0.033321678
VAMP4	-0.502911637	0.035306876
VEZT	-0.66620792	0.029853129
VPS37A	-0.531966124	0.048711197
VPS54	-0.619917543	0.035306876
WBP4	-0.510918823	0.033219804
WDFY1	-0.724700549	0.02964492
WDR47	-0.72046218	0.031155866
WDR75	-0.716621831	0.02964492
WRN	-0.539265404	0.046963619
WWP1	-0.763102911	0.02964492
YAE1D1	-0.577668431	0.042176906
YEATS4	-0.883052436	0.032056215
YWHAQ	-0.525221111	0.047609598
ZBED6	-0.541421933	0.02964492
ZBTB1	-0.966435797	0.030189113
ZBTB11	-0.585509086	0.035306876
ZBTB2	-0.547638279	0.035182356
ZBTB26	-0.551165133	0.03525689
ZBTB41	-1.095157869	0.031322811
ZC3H15	-0.509297995	0.030189113
ZC3H7A	-0.61009139	0.045955659
ZCCHC9	-0.560675602	0.030189113
ZFAND1	-0.947005782	0.033539573
ZFP62	-0.949507128	0.02964492
ZFP69	-0.681911	0.033219804
ZFR	-0.840045507	0.02964492
ZFY	-0.594827021	0.043315506
ZHX1	-0.580328662	0.038558088
ZMAT1	-0.530073048	0.035867725
ZMYM1	-0.866805989	0.02964492
ZMYM5	-0.707745255	0.02964492
ZNF117	-0.756898423	0.04385604
ZNF12	-0.804643136	0.030189113
ZNF14	-0.626487433	0.041415789
ZNF140	-0.705139097	0.032056215
ZNF146	-0.848553693	0.02964492
ZNF184	-0.86088085	0.031155866
ZNF195	-0.868359868	0.02964492
ZNF227	-0.556454962	0.04722904
ZNF23	-0.880398207	0.031155866
ZNF230	-0.528806664	0.040134394
ZNF25	-0.613627595	0.03525689
ZNF26	-0.575336872	0.02964492
ZNF292	-0.603584223	0.038519132
ZNF30	-0.596755766	0.033539573
ZNF322	-0.522618963	0.035306876
ZNF367	-0.786156362	0.031155866
ZNF383	-0.546510926	0.047108666
ZNF420	-0.761597973	0.032056215
ZNF430	-0.573280223	0.040590637
ZNF439	-0.926087532	0.031155866
ZNF45	-0.643165102	0.030245676
ZNF558	-0.529222049	0.046574608
ZNF559	-0.699332099	0.033219804
ZNF565	-0.506847483	0.038558088
ZNF567	-0.6887595	0.030189113
ZNF600	-0.802720565	0.03872344
ZNF638	-0.530594901	0.033219804
ZNF644	-0.963055973	0.02964492
ZNF680	-0.651007973	0.047609598
ZNF700	-0.810254916	0.033219804
ZNF75D	-0.551823992	0.031581683
ZNF770	-0.534806239	0.02964492
ZNF780A	-0.558462401	0.047609598
ZNF782	-0.922262693	0.02964492
ZNF83	-0.812780656	0.031155866
ZNF879	-0.562098045	0.033219804
ZRANB2	-0.771600354	0.031155866
ZUFSP	-0.774281158	0.037330535
ZWILCH	-0.757124901	0.02964492
ZWINT	-0.563355786	0.036806596
ZZZ3	-0.550052984	0.03802621
