# Supplementary material for: Application of Drug Efficiency Index Metric for Analysis of Post-Traumatic Stress Disorder and Treatment Resistant Depression Gene Expression Profiles
Source: MDPI journal article supplement (doi:10.3390/psychoactives2020007), 2023-03-23
Supplement: s1 [file s1 › Supplementary File S9.xlsx]

## Sheet: GSE860_D_vs_N
SYMBOL	marker	AUC	UpDown	Log2FC	Description	Biological Process (GO)
PAX3	PAX3	0.860294117647059	Up	0.231912672487478	paired box 3	GO:0007605 sensory perception of sound;GO:0050954 sensory perception of mechanical stimulus;GO:0007517 muscle organ development

## Sheet: GSE64814-GPL6244_D_vs_N
SYMBOL	marker	AUC	UpDown	Log2FC	Description	Biological Process (GO)
EPSTI1	EPSTI1	0.729166666666667	Up	0.839890612183744	epithelial stromal interaction 1

## Sheet: GSE64814-GPL6244_P_vs_N
SYMBOL	marker	AUC	UpDown	Log2FC	Description	Biological Process (GO)
SCARNA7	SCARNA7	0.986111111111111	Down	-1.23392192078689	small Cajal body-specific RNA 7	GO:0006396 RNA processing;GO:0016070 RNA metabolic process;GO:0090304 nucleic acid metabolic process
DRAP1	DRAP1	0.980902777777778	Up	1.05611228607609	DR1 associated protein 1	GO:0006366 transcription by RNA polymerase II;GO:0006351 DNA-templated transcription;GO:0097659 nucleic acid-templated transcription
SNORD6	SNORD6	0.975694444444444	Down	-2.77602288320424	small nucleolar RNA, C/D box 6	GO:0006396 RNA processing;GO:0016070 RNA metabolic process;GO:0090304 nucleic acid metabolic process
ROMO1	ROMO1	0.951388888888889	Up	1.48882241308486	reactive oxygen species modulator 1	GO:0051838 cytolysis by host of symbiont cells;GO:0045039 protein insertion into mitochondrial inner membrane;GO:0090399 replicative senescence
RPPH1	RPPH1	0.9375	Up	0.923092837126365	ribonuclease P RNA component H1	GO:0090502 RNA phosphodiester bond hydrolysis, endonucleolytic;GO:0008033 tRNA processing;GO:0090501 RNA phosphodiester bond hydrolysis
SNORD43	SNORD43	0.932291666666667	Down	-1.55221758225938	small nucleolar RNA, C/D box 43	GO:0006396 RNA processing;GO:0016070 RNA metabolic process;GO:0090304 nucleic acid metabolic process
NELFE	NELFE	0.927083333333333	Down	-0.963082054311144	negative elongation factor complex member E	GO:0034244 negative regulation of transcription elongation by RNA polymerase II;GO:0032785 negative regulation of DNA-templated transcription, elongation;GO:0051571 positive regulation of histone H3-K4 methylation
CYTH1	CYTH1	0.921875	Down	-0.531809679407306	cytohesin 1	GO:0032012 regulation of ARF protein signal transduction;GO:0090162 establishment of epithelial cell polarity;GO:0030010 establishment of cell polarity
SNORA65	SNORA65	0.892361111111111	Up	1.00823526316818	small nucleolar RNA, H/ACA box 65	GO:0006396 RNA processing;GO:0016070 RNA metabolic process;GO:0090304 nucleic acid metabolic process
SCARNA17	SCARNA17	0.907986111111111	Down	-0.812247466698052	small Cajal body-specific RNA 17	GO:0006396 RNA processing;GO:0016070 RNA metabolic process;GO:0090304 nucleic acid metabolic process
C6orf47	C6orf47	0.901041666666667	Down	-0.560338562593833	chromosome 6 open reading frame 47
IFNE	IFNE	0.901041666666667	Up	0.464578424770594	interferon epsilon	GO:0033141 positive regulation of peptidyl-serine phosphorylation of STAT protein;GO:0033139 regulation of peptidyl-serine phosphorylation of STAT protein;GO:0002323 natural killer cell activation involved in immune response
ACAA1	ACAA1	0.887152777777778	Down	-0.648942857047352	acetyl-CoA acyltransferase 1	GO:0010124 phenylacetate catabolic process;GO:0036109 alpha-linolenic acid metabolic process;GO:0033540 fatty acid beta-oxidation using acyl-CoA oxidase
SNORD24	SNORD24	0.873263888888889	Up	1.24719265586691	small nucleolar RNA, C/D box 24	GO:0006396 RNA processing;GO:0016070 RNA metabolic process;GO:0090304 nucleic acid metabolic process
PHTF1	PHTF1	0.876736111111111	Down	-0.388594833309574	putative homeodomain transcription factor 1
SNORD68	SNORD68	0.873263888888889	Up	0.862827424755416	small nucleolar RNA, C/D box 68	GO:0006396 RNA processing;GO:0016070 RNA metabolic process;GO:0090304 nucleic acid metabolic process
CADM2	CADM2	0.869791666666667	Up	0.908695735664974	cell adhesion molecule 2	GO:0007156 homophilic cell adhesion via plasma membrane adhesion molecules;GO:0098742 cell-cell adhesion via plasma-membrane adhesion molecules;GO:0098609 cell-cell adhesion

## Sheet: GSE81761_R_vs_N
SYMBOL	marker	AUC	UpDown	Log2FC	Description	Biological Process (GO)
ZWINT	ZWINT	1	Down	-0.580396125026877	ZW10 interacting kinetochore protein	GO:0007094 mitotic spindle assembly checkpoint signaling;GO:0071173 spindle assembly checkpoint signaling;GO:0071174 mitotic spindle checkpoint signaling
ZWILCH	ZWILCH	1	Down	-0.525606664404028	zwilch kinetochore protein	GO:0034501 protein localization to kinetochore;GO:1903083 protein localization to condensed chromosome;GO:0007094 mitotic spindle assembly checkpoint signaling
ZSWIM8	ZSWIM8	1	Up	0.270892389211139	zinc finger SWIM-type containing 8	GO:2000627 positive regulation of miRNA catabolic process;GO:2000625 regulation of miRNA catabolic process;GO:2000630 positive regulation of miRNA metabolic process
ZNRF2	ZNRF2	1	Down	-0.208489889084154	zinc and ring finger 2	GO:0070936 protein K48-linked ubiquitination;GO:0000209 protein polyubiquitination;GO:0043161 proteasome-mediated ubiquitin-dependent protein catabolic process
ZNHIT6	ZNHIT6	1	Down	-0.439509288005112	zinc finger HIT-type containing 6	GO:0048254 snoRNA localization;GO:0000492 box C/D snoRNP assembly;GO:0000491 small nucleolar ribonucleoprotein complex assembly
ZNF84	ZNF84	1	Down	-0.501052193113362	zinc finger protein 84	GO:0006357 regulation of transcription by RNA polymerase II;GO:0006355 regulation of DNA-templated transcription;GO:1903506 regulation of nucleic acid-templated transcription
ZNF830	ZNF830	1	Down	-0.553191578787517	zinc finger protein 830	GO:0001546 preantral ovarian follicle growth;GO:0048162 multi-layer follicle stage;GO:0060729 intestinal epithelial structure maintenance

## Sheet: GSE185855_R_vs_N
SYMBOL	marker	AUC	UpDown	Log2FC	Description	Biological Process (GO)
TFR2	TFR2	0.852083333333333	Up	0.684341134016895	transferrin receptor 2	GO:0140298 endocytic iron import into cell;GO:0033212 iron import into cell;GO:0071281 cellular response to iron ion
PBX1	PBX1	0.854166666666667	Up	1.15704072108465	PBX homeobox 1	GO:0001779 natural killer cell differentiation;GO:0035162 embryonic hemopoiesis;GO:0030325 adrenal gland development
CCDC176	CCDC176	0.852083333333333	Up	1.12358582239745	basal body orientation factor 1	GO:0044458 motile cilium assembly;GO:0060271 cilium assembly;GO:0044782 cilium organization
TAL1	TAL1	0.84375	Up	1.16816164290321	TAL bHLH transcription factor 1, erythroid differentiation factor	GO:0030221 basophil differentiation;GO:1905269 positive regulation of chromatin organization;GO:0035162 embryonic hemopoiesis
FAM210B	FAM210B	0.845833333333333	Up	1.09295122311804	family with sequence similarity 210 member B	GO:0043249 erythrocyte maturation;GO:0045648 positive regulation of erythrocyte differentiation;GO:0048821 erythrocyte development
TPGS2	TPGS2	0.839583333333333	Up	0.57379360194779	tubulin polyglutamylase complex subunit 2	GO:0018095 protein polyglutamylation;GO:0018200 peptidyl-glutamic acid modification;GO:0018193 peptidyl-amino acid modification
TMCC2	TMCC2	0.847916666666667	Up	1.28689535985795	transmembrane and coiled-coil domain family 2	GO:0042982 amyloid precursor protein metabolic process;GO:0019538 protein metabolic process;GO:1901564 organonitrogen compound metabolic process
FBXO7	FBXO7	0.839583333333333	Up	1.09337975752473	F-box protein 7	GO:1903599 positive regulation of autophagy of mitochondrion;GO:1903204 negative regulation of oxidative stress-induced neuron death;GO:1903203 regulation of oxidative stress-induced neuron death
BCL2L1	BCL2L1	0.833333333333333	Up	1.10665976822704	BCL2 like 1	GO:0019048 modulation by virus of host process;GO:0019050 suppression by virus of host apoptotic process;GO:0019054 modulation by virus of host cellular process
GYPB	GYPB	0.827083333333333	Up	2.05700752861897	glycophorin B (MNS blood group)
ADIPOR1	ADIPOR1	0.83125	Up	0.74541292013029	adiponectin receptor 1	GO:0033211 adiponectin-activated signaling pathway;GO:0033210 leptin-mediated signaling pathway;GO:0044320 cellular response to leptin stimulus
